# Supplementary material for: ICOS+PD-1+CXCR3+ T follicular helper cells contribute to the generation of high-avidity antibodies following influenza vaccination
Source: PubMed Central journal article supplement (PMC4882544; doi:10.1038/srep26494), 2016-05-27
Supplement: srep26494-s1.pdf [file srep26494-s1.pdf]

**Supplementary Figures for**

**ICOS<sup>+</sup>PD-1<sup>+</sup>CXCR3<sup>+</sup> T Follicular Helper Cells Contribute to the Generation of High Avidity Antibodies Following Influenza Vaccination**

Salah-Eddine Bentebibel<sup>1\*</sup>, Surender Khurana<sup>2\*</sup>, Nathalie Schmitt<sup>1</sup>, Parvathi Kurup<sup>1</sup>, Cynthia Mueller<sup>1</sup>, Gerlinde Obermoser<sup>1</sup>, A. Karolina Palucka<sup>1</sup>, Randy A. Albrecht<sup>3,4</sup>, Adolfo Garcia-Sastre<sup>3,4,5</sup>, Hana Golding<sup>2</sup>, and Hideki Ueno<sup>1,6</sup>

<sup>1</sup>Baylor Institute for Immunology Research, Baylor Research Institute, Dallas, TX, 75204, USA

<sup>2</sup>Division of Viral Products, Center for Biologics Evaluation and Research, U.S. Food and Drug Administration, Bethesda, MD 20892, USA.

<sup>3</sup>Department of Microbiology, <sup>4</sup>Global Health and Emerging Pathogens Institute, <sup>5</sup>Department of Medicine, Division of Infectious Diseases, Icahn School of Medicine at Mount Sinai, New York, NY 10029, USA

<sup>6</sup>Current address: Department of Microbiology, Global Health and Emerging Pathogens Institute, Icahn School of Medicine at Mount Sinai, New York, NY 10029, USA

**Figure S1: Ab response in the three subgroups**

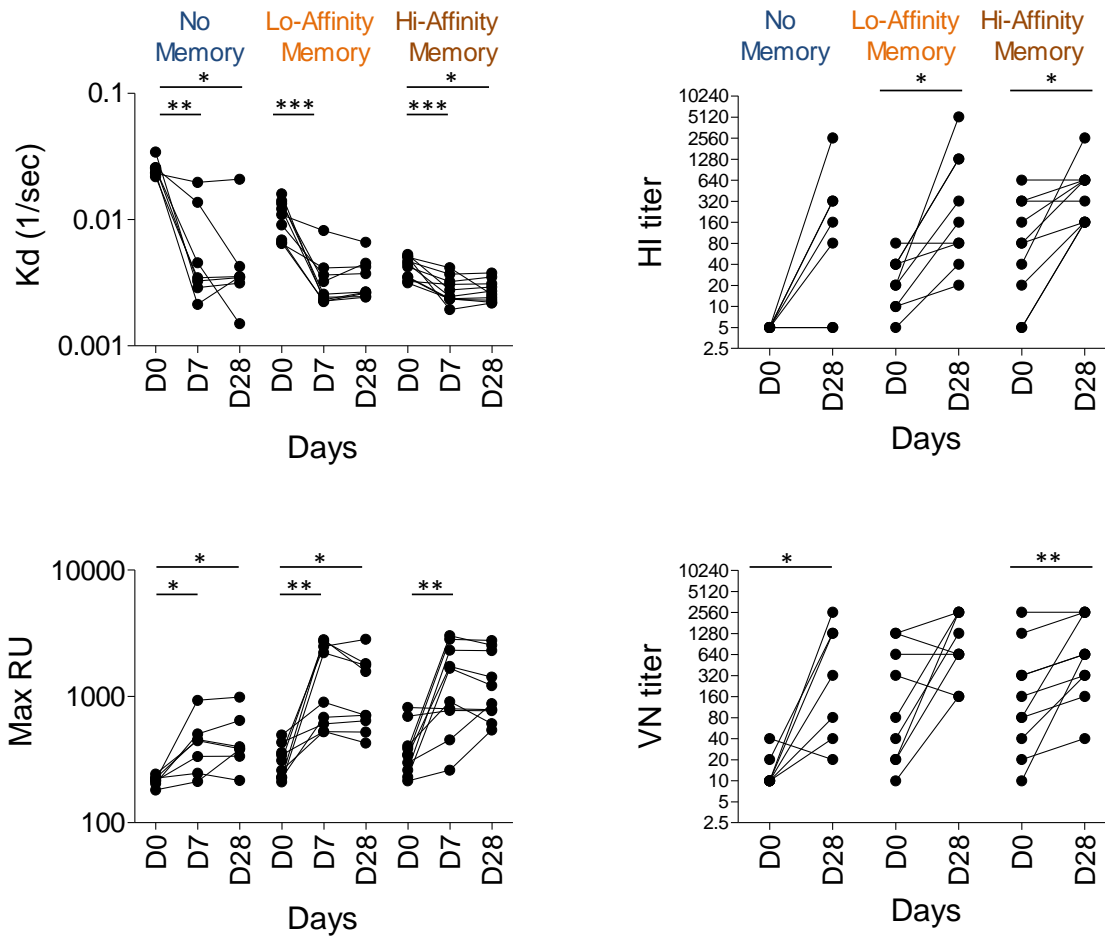

The amount (Max RU) and the avidity (Kd) of serum polyclonal IgG specific for pH1N1 HA1 at day 0, 7, and 28 post-TIV in the three subgroups (as indicated in Fig. 2b) were determined by surface plasmon resonance. The HI and VN titers against pH1N1 were determined at day 0 and 28. Paired t-test. p-value \* <0.05, \*\* <0.01, \*\*\* < 0.001.

**Figure S2: The increase of ICOS<sup>+</sup> CXCR3<sup>+</sup> cTfh cells in absolute numbers correlates with the increase in Ab avidity**

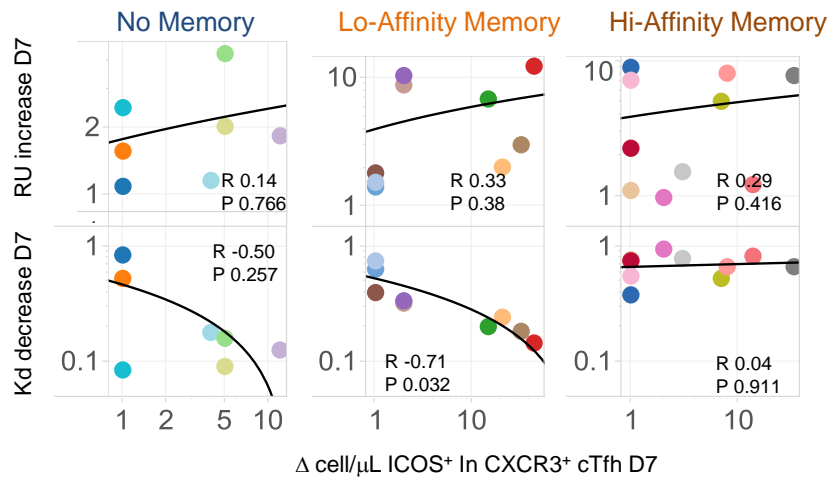

The correlation between the increase of ICOS<sup>+</sup>PD-1<sup>+</sup>CXCR3<sup>+</sup> cTfh cells in absolute number at day 7 post-TIV and the fold increase of Max RU/the fold decrease of Kd at day 7 in each group. Spearman R and p-value are indicated.

**Figure S3: Classification of the subjects according to the baseline titers**

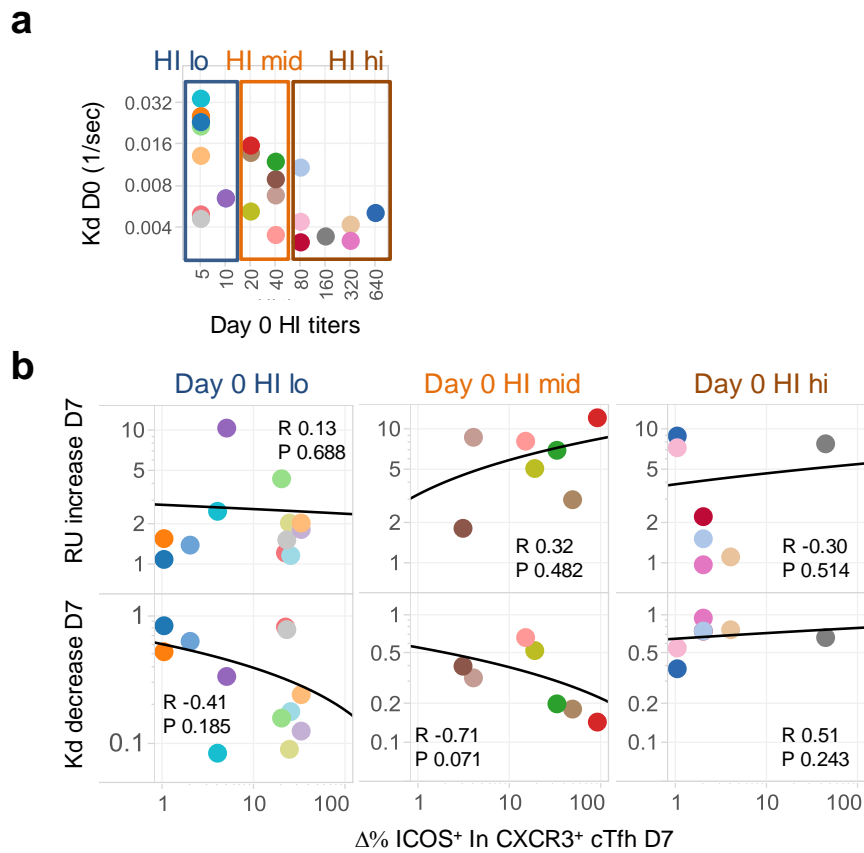

**a.** Classification of the subjects according to the baseline titers (HI low  $\leq 10$ ,  $n=12$ ; HI mid between 20 and 40,  $n=7$ ; HI high  $\geq 80$ ,  $n=7$ ).

**b.** The correlation between the increase of  $\text{ICOS}^+ \text{PD-1}^+ \text{CXCR3}^+$  cTfh cells at day 7 post-TIV and the fold increase of Max RU/the fold decrease of Kd at day 7 in each group.

**Figure S4: cTfh cells at day 7 post-TIV contain cells specific for HA and M1**

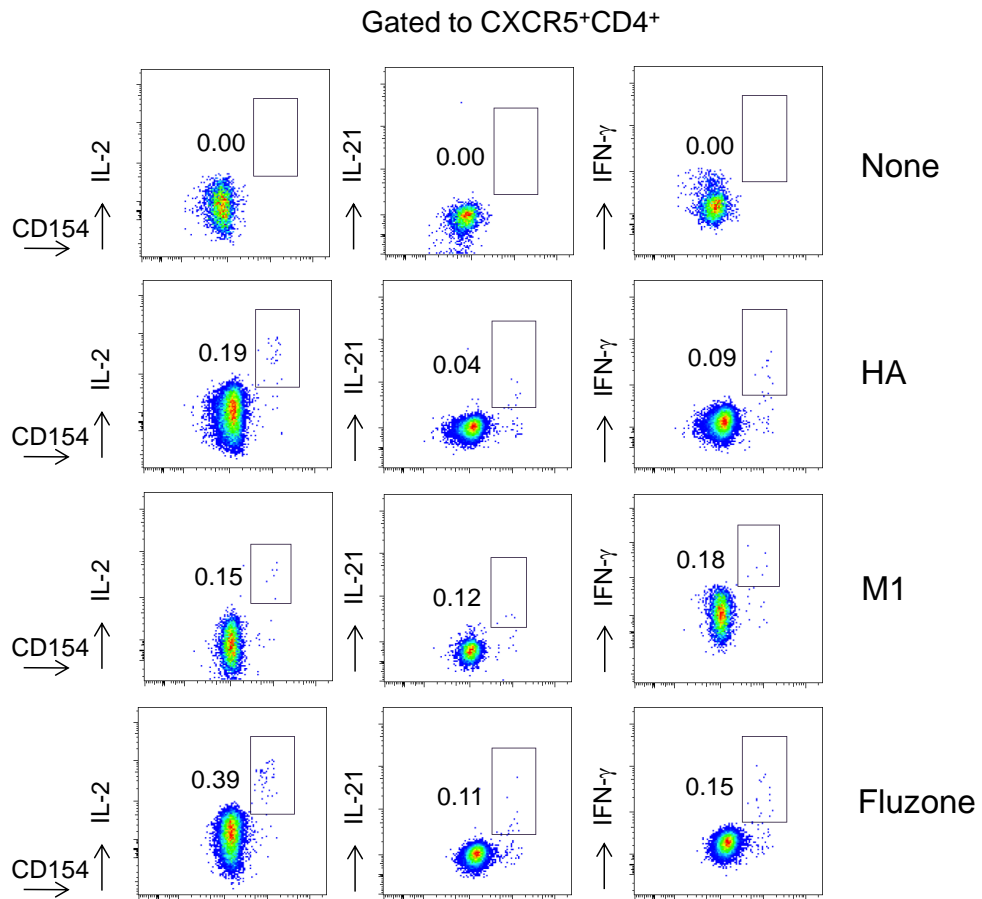

The CD154 assay was performed with PBMCs at day 7 post-TIV and overlapping peptide libraries derived from the proteins of the 2009 pandemic H1N1 strain. The results with overlapping peptides of hemagglutinin (HA) and matrix protein 1 (M1) in one donor are shown. The frequency of CD154<sup>+</sup>cytokine<sup>+</sup> cells within CXCR5<sup>+</sup>CD4<sup>+</sup> T cells is indicated. The result with the peptide diluent alone (none) is provided as negative control. Of note, the stimulation with Fluzone also induced CD154<sup>+</sup>cytokine<sup>+</sup> cells within CXCR5<sup>+</sup>CD4<sup>+</sup> T cells.

**Figure S5: CXCR5<sup>-</sup> CD4<sup>+</sup> T cells at day 7 post-TIV contain cells specific for HA and M1**

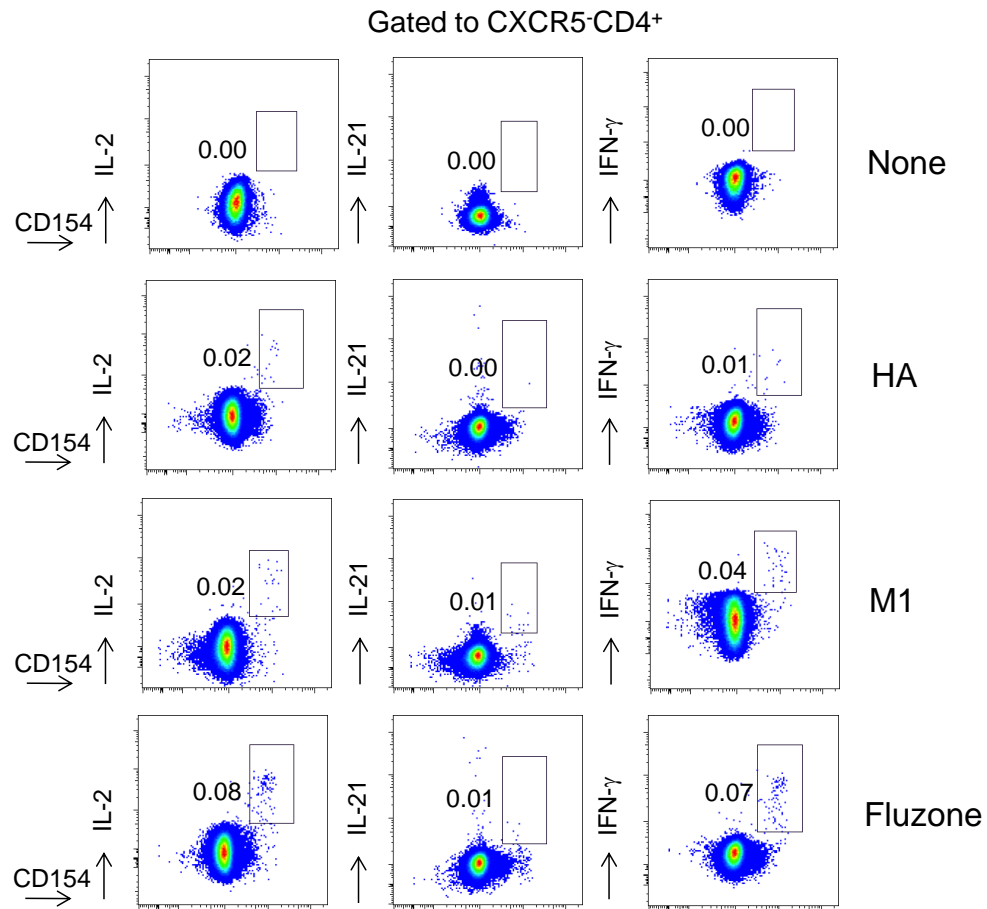

The frequency of CD154<sup>+</sup>cytokine<sup>+</sup> cells within CXCR5<sup>-</sup>CD4<sup>+</sup> T cells in the same experiments shown in Fig. S4 is shown.
